# Supplementary material
Source: publisher figshare collection journal article supplement (https://gsajournals.figshare.com/ndownloader/files/21806235)
Supplement: Supplementary file 1 [file 21806235]

## Sheet: proteinGroups.txt
Protein names	Intensity EV-C	Intensity TGI-C	TGI/EV	On contaminant list A Veraksa	Razor + unique peptides EV-C	Razor + unique peptides TGI-C	Protein IDs
Tgi	22517	8091400	359.346		8	36	>tr|Q8IQJ9|Q8IQJ9_DROME RE45537p OS=Drosophila melanogaster GN=Tgi PE=2 SV=1;>tr|Q9VU85|Q9VU85_DROME Tondu-domain-containing growth inhibitor, isoform A OS=Drosophila melanogaster GN=Tgi PE=4 SV=1
Heat shock 70 kDa protein cognate 4	9534.1	4471000	468.948	+	7	39	>sp|P11147|HSP7D_DROME Heat shock 70 kDa protein cognate 4 OS=Drosophila melanogaster GN=Hsc70-4 PE=1 SV=3
Heat shock 70 kDa protein cognate 3	1147.1	1833500	1598.38	+	3	32	>tr|F3YDH0|F3YDH0_DROME Heat shock 70-kDa protein cognate 3, isoform E OS=Drosophila melanogaster GN=Hsc70-3 PE=2 SV=1;>sp|P29844|HSP7C_DROME Heat shock 70 kDa protein cognate 3 OS=Drosophila melanogaster GN=Hsc70-3 PE=2 SV=2
C-terminal-binding protein	0	1220100	∞		0	22	>sp|O46036|CTBP_DROME C-terminal-binding protein OS=Drosophila melanogaster GN=CtBP PE=1 SV=3
Heat shock 70 kDa protein cognate 1	0	518650	∞	+	0	2	>sp|P29843|HSP7A_DROME Heat shock 70 kDa protein cognate 1 OS=Drosophila melanogaster GN=Hsc70-1 PE=1 SV=1;>tr|Q8I0E9|Q8I0E9_DROME AT07372p OS=Drosophila melanogaster GN=Hsc70-1 PE=2 SV=1
Heat shock 70 kDa protein cognate 5	0	157660	∞	+	0	19	>sp|P29845|HSP7E_DROME Heat shock 70 kDa protein cognate 5 OS=Drosophila melanogaster GN=Hsc70-5 PE=1 SV=2
Tubulin alpha-3 chain;Tubulin alpha-1 chain;Tubulin alpha-2 chain	440.72	25782	58.4997	+	1	10	>tr|A4V2J2|A4V2J2_DROME Alpha-Tubulin at 84D, isoform B OS=Drosophila melanogaster GN=alphaTub84D PE=3 SV=1;>sp|P06605|TBA3_DROME Tubulin alpha-3 chain OS=Drosophila melanogaster GN=alphaTub84D PE=2 SV=1;>sp|P06603|TBA1_DROME Tubulin alpha-1 chain OS=Droso
Tubulin beta-1 chain;Tubulin beta-2 chain	0	20419	∞	+	0	7	>tr|A1ZBL0|A1ZBL0_DROME Beta-Tubulin at 56D, isoform A OS=Drosophila melanogaster GN=betaTub56D PE=2 SV=1;>sp|Q24560|TBB1_DROME Tubulin beta-1 chain OS=Drosophila melanogaster GN=betaTub56D PE=1 SV=2;>tr|A1ZBL1|A1ZBL1_DROME Beta-Tubulin at 56D, isoform C O
Pyruvate carboxylase	28018	19803	0.706796	+	8	8	>tr|Q7KN97|Q7KN97_DROME Pyruvate carboxylase OS=Drosophila melanogaster GN=PCB PE=2 SV=1;>tr|Q0E9E2|Q0E9E2_DROME Pyruvate carboxylase OS=Drosophila melanogaster GN=PCB PE=4 SV=1
Acetyl-CoA carboxylase	33097	16002	0.483488	+	20	13	>tr|Q7JV23|Q7JV23_DROME CG11198, isoform B OS=Drosophila melanogaster GN=ACC PE=2 SV=1;>tr|A1Z784|A1Z784_DROME CG11198, isoform A OS=Drosophila melanogaster GN=ACC PE=4 SV=1;>tr|A8DY67|A8DY67_DROME CG11198, isoform D OS=Drosophila melanogaster GN=ACC PE=4
Heat shock protein 68	0	10398	∞	+	0	5	>sp|O97125|HSP68_DROME Heat shock protein 68 OS=Drosophila melanogaster GN=Hsp68 PE=1 SV=1
Scalloped	325.98	7716.8	23.6726		1	5	>tr|Q8IR25|Q8IR25_DROME Scalloped, isoform A OS=Drosophila melanogaster GN=sd PE=4 SV=1;>tr|X2JFL9|X2JFL9_DROME Scalloped, isoform T OS=Drosophila melanogaster GN=sd PE=4 SV=1;>tr|A8JUY5|A8JUY5_DROME Scalloped, isoform D OS=Drosophila melanogaster GN=sd PE
Pits	0	4261.1	∞		0	2	>tr|M9PHN7|M9PHN7_DROME CG11138, isoform E OS=Drosophila melanogaster GN=CG11138 PE=4 SV=1;>tr|Q9VYL7|Q9VYL7_DROME CG11138, isoform C OS=Drosophila melanogaster GN=CG11138 PE=4 SV=2;>tr|B7Z143|B7Z143_DROME CG11138, isoform D OS=Drosophila melanogaster GN=C
Heatshock protein cognate 70Cb	0	3574.6	∞	+	0	5	>tr|Q9VUC1|Q9VUC1_DROME CG6603-PA, isoform A OS=Drosophila melanogaster GN=Hsc70Cb PE=2 SV=1;>tr|M9MSL3|M9MSL3_DROME Hsc70Cb, isoform G OS=Drosophila melanogaster GN=Hsc70Cb PE=3 SV=1
Actin-5C;Actin-42A;Actin, indirect flight muscle;Actin-57B;Actin-87E	0	3425.9	∞		0	3	>tr|X2JCP8|X2JCP8_DROME Actin 5C, isoform E OS=Drosophila melanogaster GN=Act5C PE=3 SV=1;>sp|P10987|ACT1_DROME Actin-5C OS=Drosophila melanogaster GN=Act5C PE=1 SV=4;>sp|P02572|ACT2_DROME Actin-42A OS=Drosophila melanogaster GN=Act42A PE=1 SV=3;>tr|E1JGP0
14-3-3 protein zeta	0	2345.7	∞		0	2	>sp|P29310-3|1433Z_DROME Isoform C of 14-3-3 protein zeta OS=Drosophila melanogaster GN=14-3-3zeta;>sp|P29310-2|1433Z_DROME Isoform VI of 14-3-3 protein zeta OS=Drosophila melanogaster GN=14-3-3zeta;>sp|P29310|1433Z_DROME 14-3-3 protein zeta OS=Drosophila
Elongation factor 1-alpha;Elongation factor 1-alpha 2;Elongation factor 1-alpha 1	0	2137.9	∞	+	0	2	>tr|A4V3Q6|A4V3Q6_DROME Elongation factor 1-alpha OS=Drosophila melanogaster GN=Ef1alpha100E PE=3 SV=1;>sp|P05303|EF1A2_DROME Elongation factor 1-alpha 2 OS=Drosophila melanogaster GN=Ef1alpha100E PE=2 SV=2;>sp|P08736|EF1A1_DROME Elongation factor 1-alpha
Methylcrotonoyl-CoA carboxylase 1	2710.3	2080.6	0.767664	+	2	3	>tr|Q8I0S9|Q8I0S9_DROME CG2118, isoform B OS=Drosophila melanogaster GN=CG2118 PE=2 SV=1;>tr|Q9V9T5|Q9V9T5_DROME CG2118, isoform A OS=Drosophila melanogaster GN=CG2118 PE=2 SV=2
Yorkie	0	1918.9	∞		0	6	>sp|Q45VV3-2|YAP1_DROME Isoform D of Transcriptional coactivator yorkie OS=Drosophila melanogaster GN=yki;>sp|Q45VV3|YAP1_DROME Transcriptional coactivator yorkie OS=Drosophila melanogaster GN=yki PE=1 SV=2
